# Supplementary material for: Photocatalysis of Cr- and Fe-Doped CeO2 Nanoparticles to Selective Oxidation of 5-Hydroxymethylfurfural
Source: MDPI journal article supplement (doi:10.3390/nano13010044), 2022-12-22
Supplement: s1 [file s1]

## Supplementary Information

# Photocatalysis of Cr- and Fe-doped CeO<sub>2</sub> nanoparticles to selective oxidation of 5-hydroxymethylfurfural

Jeong-Woo Nam,<sup>1,†</sup> Vy Ngoc Pham,<sup>2,†</sup> Jeong Min Ha,<sup>1</sup> Minjeong Shin,<sup>3,\*</sup> Hangil Lee,<sup>2,\*</sup> Young-Sang Youn<sup>1,\*</sup>

<sup>1</sup>Department of Chemistry, Yeungnam University, Daehak-ro 280, Gyeongsan, Gyeongbuk 38541, Republic of Korea,

<sup>2</sup>Department of Chemistry, Sookmyung Women's University, Seoul 04310, Republic of Korea,

<sup>3</sup>School of Chemistry and Energy, Sungshin Women's University, 55, Dobong-ro 76 ga-gil, Gangbuk-gu, Seoul 01133, Republic of Korea

\*Correspondence: mshin@sungshin.ac.kr (M.S.); easyscan@sookmyung.ac.kr (H.L.); ysyoun@yu.ac.kr

(Y.-S.Y.); Tel.: +82-2-920-2772 (M.S.); Tel.: +82-2-710-9409 (H.L.); Tel.: +82-53-810-2357 (Y.-S.Y.)

<sup>†</sup>These authors contributed equally.

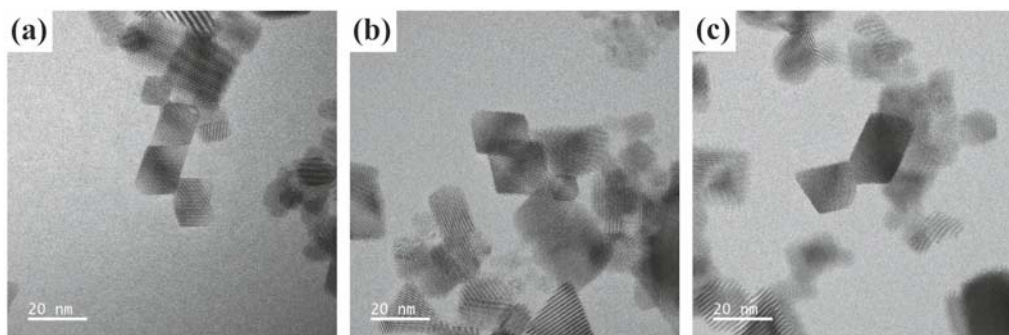

**Figure S1.** HRTEM images of (a)  $\text{CeO}_2$ , (b)  $\text{Cr@CeO}_2$ , and (c)  $\text{Fe@CeO}_2$  NPs.

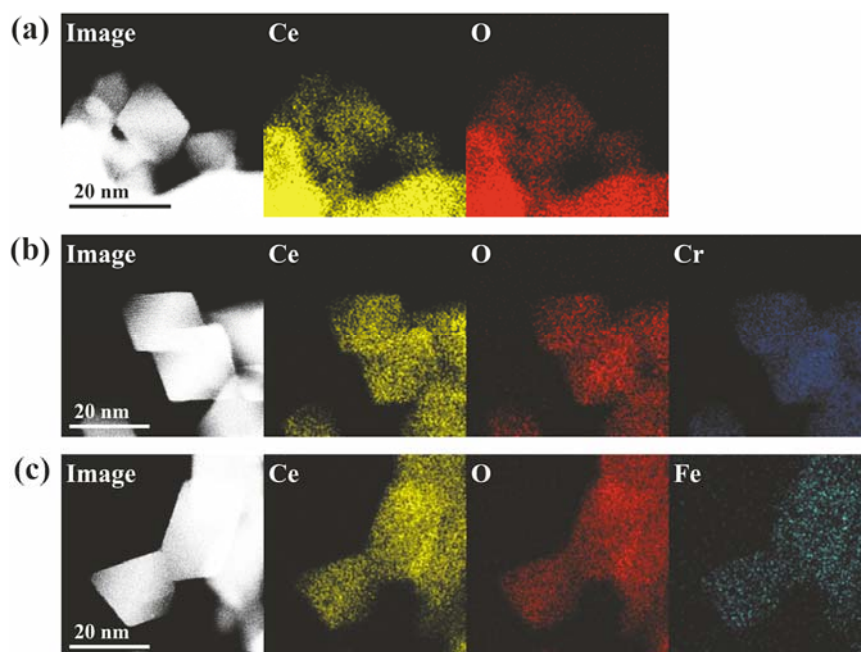

**Figure S2.** STEM-EDS data of (a)  $\text{CeO}_2$ , (b)  $\text{Cr@CeO}_2$ , and (c)  $\text{Fe@CeO}_2$  NPs.

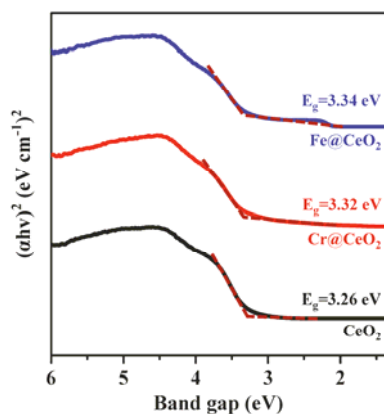

**Figure S3.** UV-Vis DRS spectra of CeO<sub>2</sub>, Cr@CeO<sub>2</sub>, and Fe@CeO<sub>2</sub> NPs.

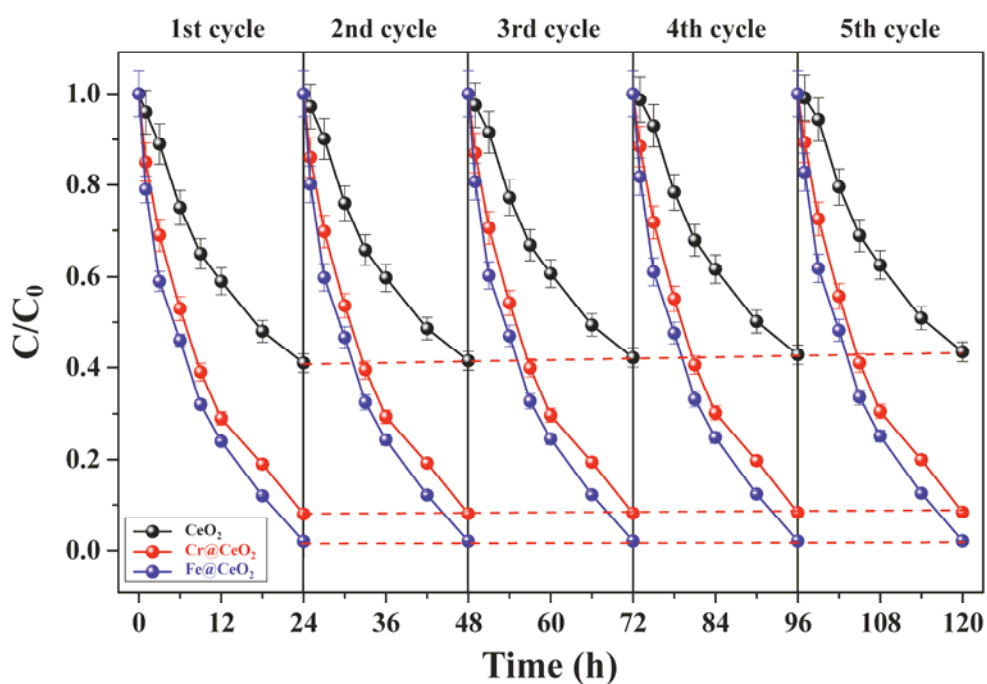

**Figure S4.** Repeated PCD results for the change in the relative amount of HMF under UV irradiation of 365 nm wavelength in the presence of CeO<sub>2</sub>, Cr@CeO<sub>2</sub>, and Fe@CeO<sub>2</sub> NPs, where the NPs were recovered at the end of each cycle for the reuse in the next cycle. C<sub>0</sub> and C indicate the initial concentration and post-reaction concentration of HMF, respectively.
